# Supplementary material
Source: PubMed Central journal article supplement (PMC9725013)
Supplement: EIJ-D-20-00259_Li_SD.pdf [file EIJ-D-20-00259_Li_SD.pdf]

## **Supplementary data**

### **Supplementary Appendix 1. Details of the AngioJet rheolytic thrombectomy procedure**

Briefly, systemic heparinisation was achieved and the AngioJet system was advanced over the 0.035-inch stiff hydrophilic guidewire which passed through the emboli and was anchored distally in the subsegmental branches. Prior to activating the Solent Omni catheter, contrast was injected through the catheter lumen, ensuring that the culprit vessel diameter was  $>3$  mm. Before the standard ART, we used power pulse-spray mode with local infusions of adjunctive urokinase (200,000 IU) directly into the thrombus through the second effluent lumen, whenever not absolutely contraindicated (e.g., head trauma, brain surgery and other major surgical procedures) for fibrinolysis. Then, rheolytic thrombectomy was performed 15-20 min after local thrombolysis, and the catheter was activated back and forth inside the thrombus with at least two runs (less than 7-10 sec per run). ART was continued until all major branches of the pulmonary arteries became recanalised, or the haemodynamic condition of the patient was improved. Mean pulmonary artery pressures (PAPs) were determined before and after the procedure. Patients with LEDVT received an inferior vena caval filter, according to the results of a venous ultrasound scan. LEDVT was treated simultaneously as mentioned above.

### **Supplementary Appendix 2. Detailed description of the three transient cardiac arrest patients**

Patient no. 1: a 21-year-old male who had undergone kidney cancer surgery seven days previously presented with acute severe shortness of breath accompanied by bilateral oppressive chest discomfort. He had shock after admission to hospital. After resuscitation, an emergency ART was performed. Refractory bradycardia and transient cardiac arrest occurred during the ART procedure and intra-aortic balloon pumping

was used to improve cardiac output.

Patient no. 2: a 49-year-old female who had undergone radical mastectomy five days previously due to breast cancer presented with dyspnoea and hypotension. She went into shock after pulmonary CTA scanning. An emergency ART was performed under inotropic support for management of massive pulmonary embolism (MPE). Refractory bradycardia and transient cardiac arrest occurred during the ART procedure and ECMO was used for maintaining her vital signs due to failed cardiopulmonary resuscitation.

Patient no. 3: a 34-year-old male patient who had a history of APE presented with transient syncope, palpitations, and dyspnoea. Severe pulmonary hypertension (>60 mmHg) and RVD were found at admission. Hypotension and dyspnoea were not alleviated after systemic thrombolysis for 24 hrs and his family agreed to ART therapy. ART was performed; refractory bradycardia and hypotension occurred during the ART procedure. A sudden transient cardiac arrest occurred when the ART procedure was about to be completed. Cardiopulmonary resuscitation combined with intra-aortic balloon pumping was performed.

**Supplementary Table 1. Comparison of baseline clinical data between the intermediate-high-risk pulmonary embolism (IHR-PE) group and the high-risk pulmonary embolism (HR-PE) group.**

|                                 | Total (n=44) | IHR-PE (n=23) | HR-PE (n=21) | <i>p</i> -value |
|---------------------------------|--------------|---------------|--------------|-----------------|
| Male                            | 21 (47.7)    | 11 (47.8)     | 10 (47.6)    | 0.989           |
| Age, years (mean±SD)            | 58.34±13.41  | 58.61±12.16   | 58.05±14.97  | 0.892           |
| Risk factors for PE:            |              |               |              |                 |
| Recent surgery                  | 21 (47.7)    | 13 (56.5)     | 8 (38.1)     | 0.222           |
| Malignancy                      | 6 (13.6)     | 3 (13.0)      | 3 (14.3)     | 1.000           |
| Immobilisation                  | 3 (6.8)      | 2 (8.7)       | 1 (4.8)      | 1.000           |
| Hypercoagulability              | 3 (6.8)      | 0 (0)         | 3 (14.3)     | 0.100           |
| Recent trauma/fractures         | 3 (6.8)      | 2 (8.7)       | 1 (4.8)      | 1.000           |
| Idiopathic                      | 8 (18.2)     | 5 (21.7)      | 3 (14.3)     | 0.803           |
| Main symptoms:                  |              |               |              |                 |
| Chest pain                      | 8 (18.2)     | 7 (30.4)      | 1 (4.8)      | 0.070           |
| Palpitations                    | 4 (9.1)      | 3 (13.0)      | 1 (4.8)      | 0.668           |
| Dyspnoea                        | 13 (29.5)    | 8 (34.8)      | 5 (23.8)     | 0.426           |
| Presyncope/syncope              | 19 (43.2)    | 4 (17.4)      | 15 (71.4)    | 0.001           |
| Cardiac arrest                  | 3 (6.8)      | 0 (0)         | 3 (14.3)     | 0.100           |
| Thrombolytic contraindications: |              |               |              |                 |
| Absolute                        | 4 (9.1)      | 1 (4.3)       | 3 (14.3)     | 0.535           |
| Relative                        | 30 (68.2)    | 13 (56.5)     | 17 (81.0)    | 0.157           |
| Clinical presentation:          |              |               |              |                 |
| Shock                           | 11 (25)      | 0 (0)         | 11 (52.4)    | 0.000           |
| Hypotension                     | 10 (22.7)    | 0 (0)         | 10 (47.6)    | 0.000           |
| PESI class 5                    | 26 (59.1)    | 9 (39.1)      | 17 (81.0)    | 0.012           |
| PESI class 4                    | 15 (34.1)    | 13 (56.5)     | 2 (9.5)      | 0.003           |

|                                                |           |           |           |       |
|------------------------------------------------|-----------|-----------|-----------|-------|
| Echocardiography:                              |           |           |           |       |
| Right ventricular dilation<br>(RV/LV >1)       | 38 (86.4) | 20 (87.0) | 18 (85.7) | 1.000 |
| Right ventricular hypokinesia                  | 23 (52.3) | 14 (60.9) | 9 (42.9)  | 0.232 |
| Tricuspid regurgitation                        | 10 (22.7) | 5 (21.7)  | 5 (23.8)  | 0.870 |
| Abnormal interventricular septal<br>motion     | 20 (45.5) | 8 (34.8)  | 12 (57.1) | 0.137 |
| Computer tomography                            | 41 (93.2) | 23 (100)  | 18 (85.7) | 0.100 |
| Saddle emboli in CT angiography                | 36 (81.8) | 15 (65.2) | 21 (100)  | 0.004 |
| DVT by sonographic examination                 | 32 (72.7) | 18 (78.3) | 14 (66.7) | 0.388 |
| Troponin I >0.01 ng/mL at<br>presentation      | 19 (43.2) | 10 (43.5) | 9 (42.9)  | 0.967 |
| D-dimer >500 ng/mL at presentation             | 41 (93.2) | 20 (87.0) | 21 (100)  | 0.234 |
| IVC filter deployed                            | 31 (70.5) | 17 (73.9) | 14 (66.7) | 0.599 |
| Local infusions of fibrinolytic agent          | 40 (90.9) | 22 (95.7) | 18 (85.7) | 0.535 |
| ART treatment for DVT and PE<br>simultaneously | 19 (43.2) | 13 (56.5) | 6 (28.6)  | 0.062 |

ART: AngioJet rheolytic thrombectomy; DVT: deep vein thrombosis; IVC: inferior vena cava; PE: pulmonary embolism; PESI: pulmonary embolism severity index

**Supplementary Table 2. The procedural results and follow-up data between patients who received the one-stop combined procedure (PE and DVT thrombectomy) and those who underwent only PE thrombectomy.**

|                       | Only PE treatment<br>(n=25) | PE and DVT<br>treatment<br>(n=19) | <i>p</i> -value |
|-----------------------|-----------------------------|-----------------------------------|-----------------|
| Run time of ART (s)   | 142.12±57.10                | 175.68±57.49                      | 0.061           |
| Procedural time (min) | 117.80±31.79                | 132.11±31.77                      | 0.147           |

|                                                      |              |              |       |
|------------------------------------------------------|--------------|--------------|-------|
| Contrast administration (ml)                         | 126.20±21.52 | 144.47±29.29 | 0.022 |
| Post-procedural major bleeding, n (%)                | 2 (8.0)      | 0 (0)        | 0.498 |
| Procedure-related arrhythmia and hypotension, n (%)  | 11 (44.0)    | 5 (26.3)     | 0.227 |
| Renal failure with haemodialysis, n (%)              | 4 (16.0)     | 2 (10.5)     | 0.936 |
| In-hospital death, n (%)                             | 3 (12.0)     | 3 (15.8)     | 1.000 |
| Rivaroxaban use, n (%)                               | 22 (88.0)    | 17 (89.5)    | 1.000 |
| Warfarin use, n (%)                                  | 3 (12.0)     | 2 (10.5)     | 1.000 |
| Extended anticoagulant >6 months, n (%) <sup>*</sup> | 9 (36.0)     | 9 (47.4)     | 0.447 |
| Post-thrombotic syndrome <sup>#</sup> , n (%)        | 0 (0)        | 4 (21.1)     | 0.029 |

---

\*The extended (>6 months or no scheduled stop date) anticoagulant therapy was performed in patients who had residual DVT or PE on ultrasound or CT imaging after completing 6 months of anticoagulant therapy or in patients with cancer. # Post-thrombotic syndrome was not found in patients with only the PE treatment because of no extensive ilio caval or iliofemoral thrombus. All 35 surviving patients did not develop VTE recurrence during the follow-up.
